# Supplementary material for: Laboratory mice engrafted with natural gut microbiota possess a wildling-like phenotype
Source: Springer Nature journal article supplement (doi:10.1038/s41467-025-60554-2), 2025-06-12
Supplement: MOESM1 [file 41467_2025_60554_MOESM1_ESM.pdf]

## Supplementary Fig. 1

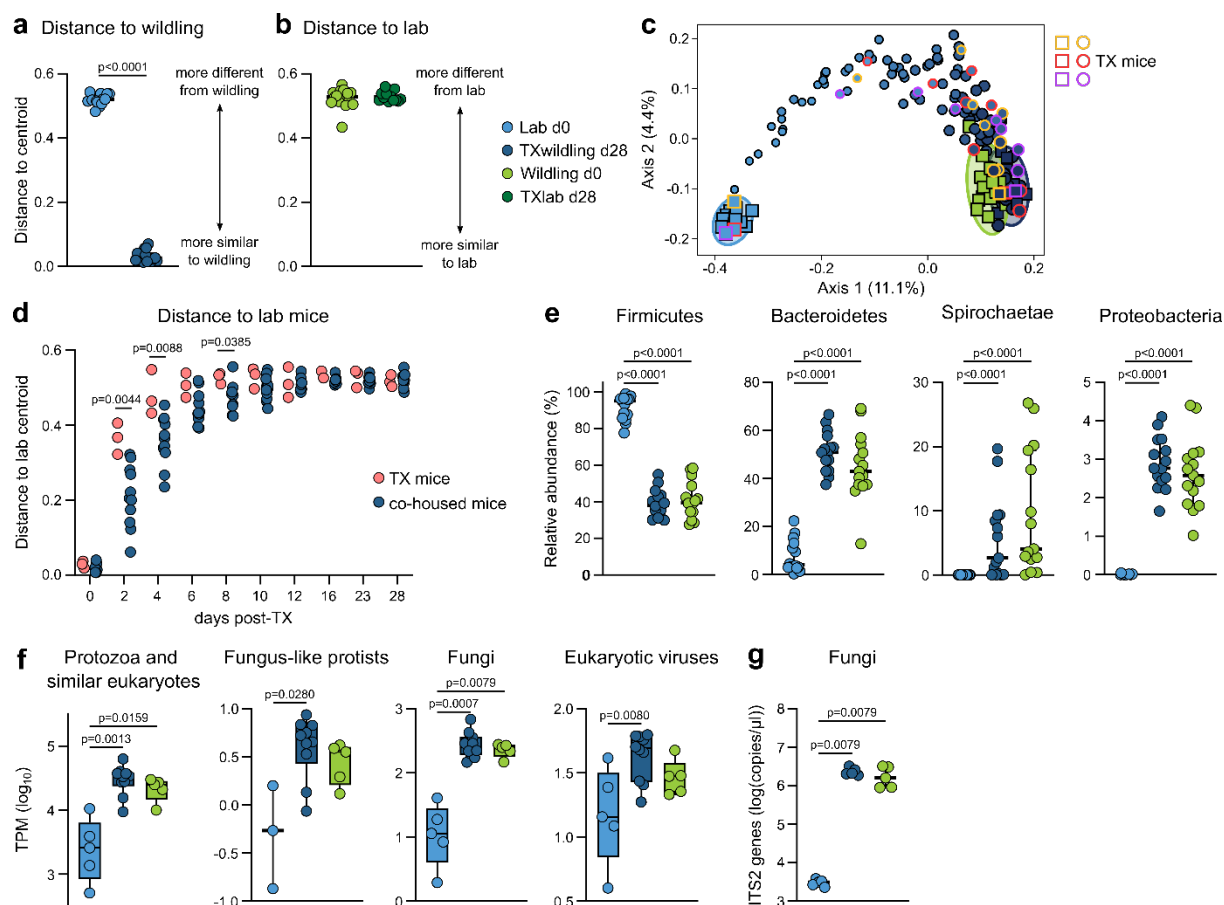

**Figure S1: Natural gut microbiota of wildlings outcompete lab microbiota.** (a) Graph shows the distance of lab mice (day 0 post-TX) or TXwildlings (day 28 post-TX) to the centroid of the wildling donors in the PCoA shown in Figure 1b. (b) Graph shows the distance of wildlings (day 0 post-TX and TXlab mice (day 28 post-TX) to the centroid of the lab donor mice in the PCoA shown in Figure 1d. (c) The graph shown in Figure 1b with those mice highlighted that received the microbiota transplantation. (d) The distance of each mouse at each timepoint to the centroid of the lab mice is calculated. The graph compares mice that received transplantation to those that were co-housed. (e) The relative abundance of the top four most abundant phyla in lab mice, TXwildlings and wildling is shown. (f) Shotgun sequencing data was analyzed for the presence of non-bacterial microorganisms. (g) Quantification of fungi by qPCR for ITS gene copies. Data are from three independent experiments (a-e) or one experiment (f-g) with  $n=5$  (a-e, g) or  $n=5-10$  (f) per group. Median  $\pm$  IQR is shown, box plots show the median, interquartile range, and full data spread via whiskers. Statistical significances were tested by unpaired, two-tailed Mann-Whitney U tests,  $p<0.05$  is shown. Source data are provided as a Source Data file.

## Supplementary Fig. 2

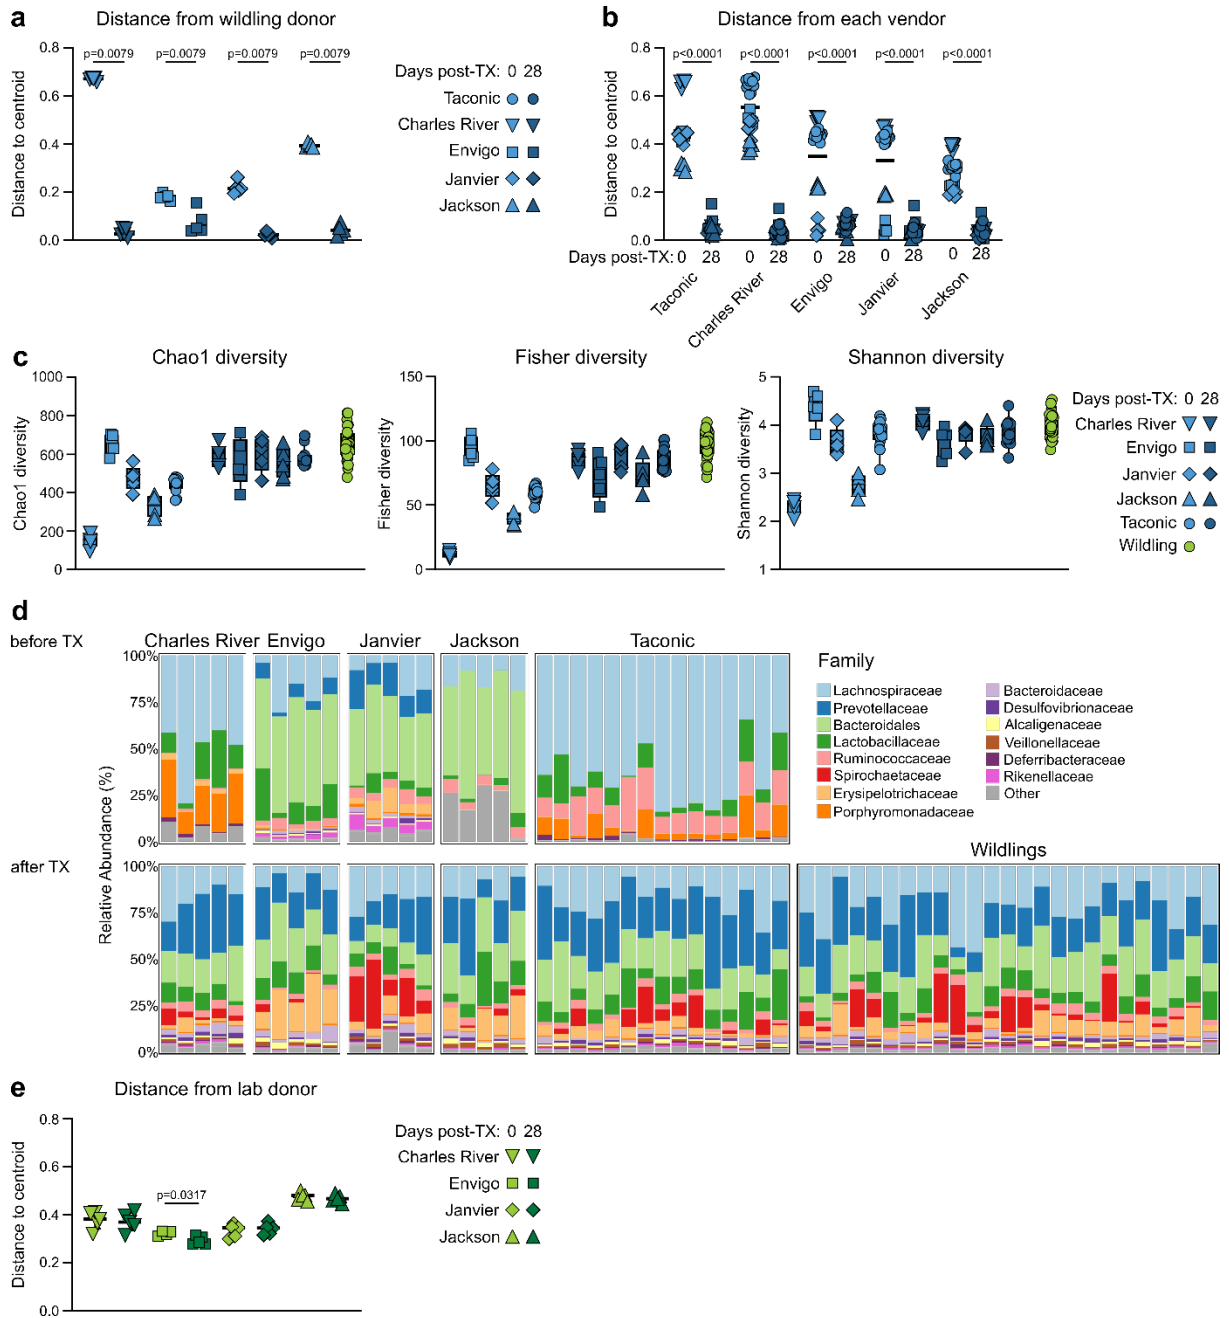

**Figure S2: Natural gut microbiota of wildlings outcompete lab microbiota from different vendors.** (a) Graph shows the distance of lab mice of different donors before and after transplantation to the centroid of the wildling donors. (b) The distance of each lab mouse before or after transplantation to the centroid of the indicated vendor at the respective day is shown. (c) Alpha diversity measures (Chao1, Fisher, Shannon) were calculated for lab microbiota of the different vendors before and 28 days post-transplantation with wildling fecal microbiota and compared to the alpha diversity of wildlings. (d) Relative abundances at the family level were calculated of the lab microbiota of the different vendors before and after transplantation as well as for wildlings. (e) Graph shows the distance of wildling mice before and after transplantation with microbiota of different lab vendors to the centroid of the respective donors. Data are from one (Charles River, Envigo, Janvier, Jackson), three (Taconic) or four (wildlings) independent experiments  $n=5$  per group. Median is shown, box plots show the median, interquartile range, and full data spread via whiskers. Statistical significances were tested by unpaired, two-tailed Mann-Whitney U tests,  $p<0.05$  is shown. Source data are provided as a Source Data file.

### Supplementary Fig. 3

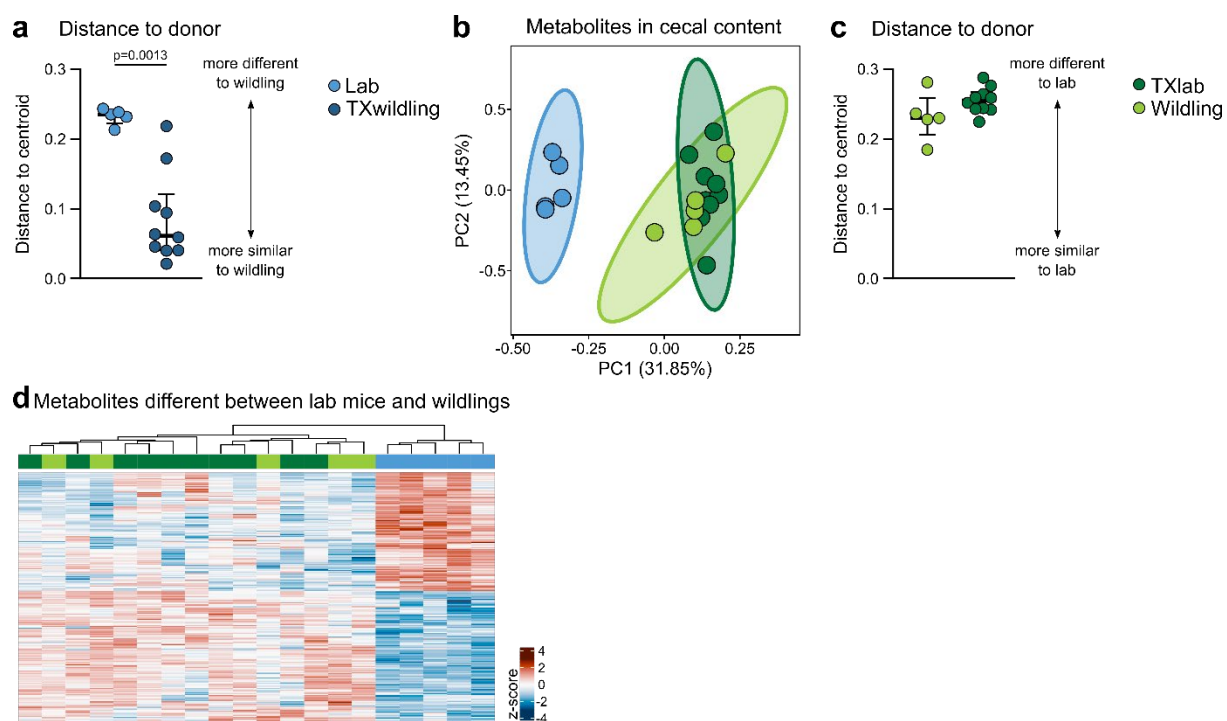

**Figure S3: The global gut metabolomics profile of TXlab mice remains stable.** A global metabolomics analysis was performed on the cecal content of wildlings, TXlab mice, and lab mice. (a) The distance of wildlings and TXlab mice to the centroid of the lab mice is depicted. (b) PCA of all detected metabolites was used to compare lab mice with TXlab mice and wildlings. (c) The distance of lab mice and TXwildlings to the centroid of wildlings in the PCA in Figure 2a is shown. (d) The heatmap shows the metabolites that were significantly different between lab mice and wildlings. Color code depicts the row-wise scaled (z-score) metabolite intensity. Median  $\pm$  IQR is shown. Statistical significances in (a) and (c) were tested by unpaired, two-tailed Mann-Whitney U tests,  $p < 0.05$  is shown. Source data are provided as a Source Data file.

## Supplementary Fig. 4

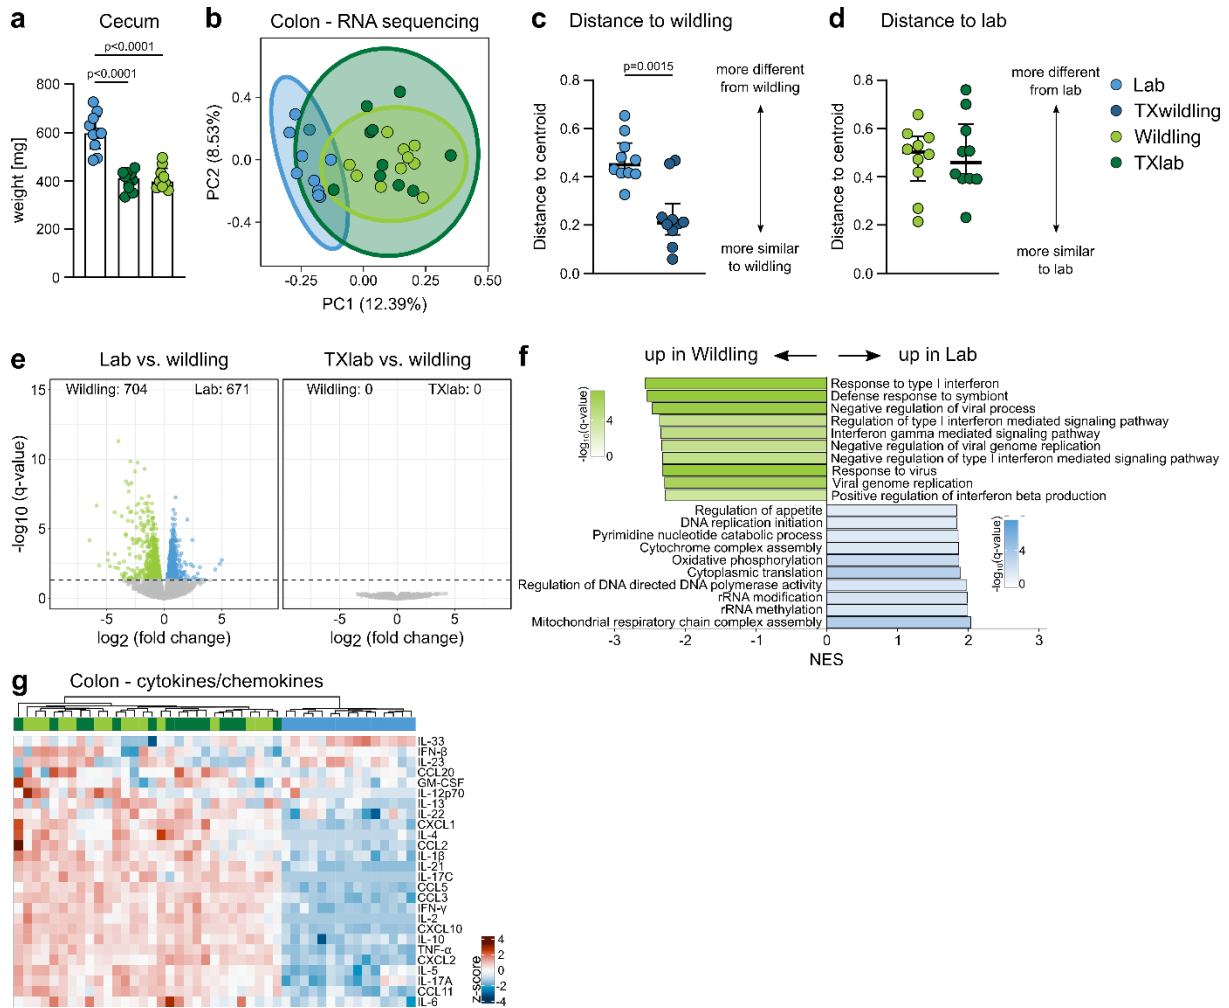

**Figure S4: TXLab mice remain wildlings.** Wildlings were engrafted with fecal material from lab mice, resulting in the TXlab mouse group, which was compared to lab mice and wildlings. (a) The cecum weight was measured and compared among the three groups. (b-f) The colon was harvested from mice of the three groups and subjected to RNA sequencing. Data was analyzed by PCA with ellipses showing a 95% confidence interval (b), the gene expression was compared between lab mice and wildlings or TXlab mice and wildlings (e), or GSEA was performed between lab mice and wildlings using Gene Ontology (Biological Processes aspect) (f). (c-d) Graphs show the distance of lab mice and TXwildlings (c) or wildlings and TXlab mice (d) to the centroid of the respective donors in the PCAs in Figure 3b and Figure S3b. (g) Cytokines and chemokines were analyzed in colon tissues of mice from the three groups by a multiplex MSD assay. Color code depicts the row-wise scaled (z-score) cytokine concentration. All cytokines that were above the detection limit in >50% of the samples are shown in the heatmaps. Data are from two (b-f) or three (a, g) independent experiments with n=5 per group. Median  $\pm$  IQR is shown. Statistical significances were tested by unpaired, two-tailed Mann-Whitney U tests, p<0.05 is shown. Source data are provided as a Source Data file.

## Supplementary Fig. 5

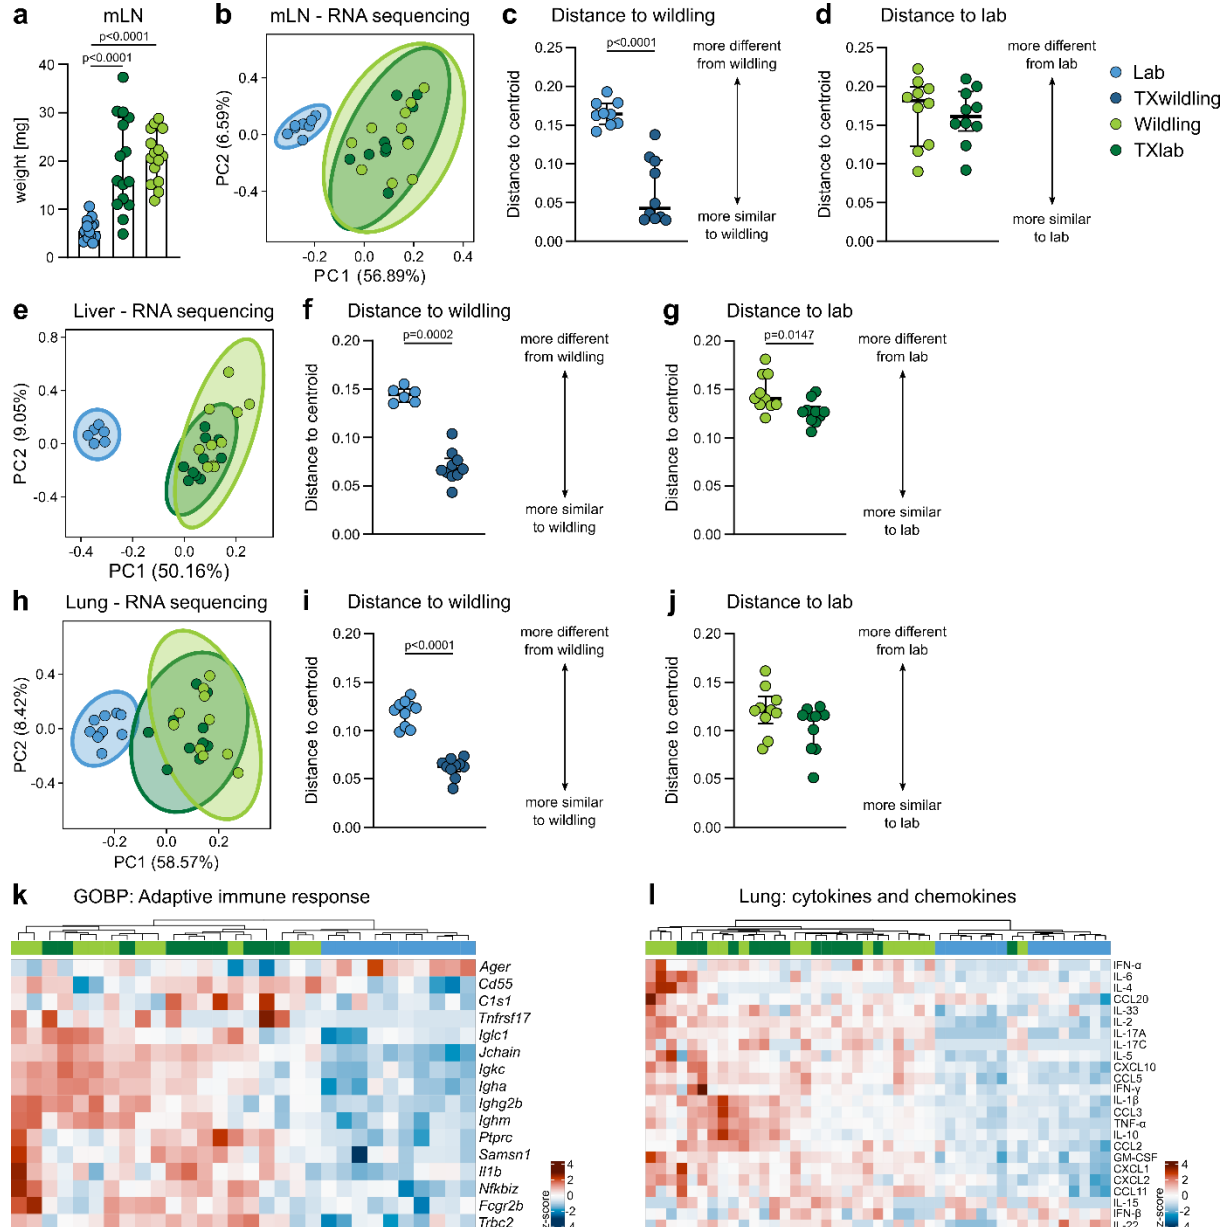

**Figure S5: Analysis of mLN, liver, and lung tissue in lab mice, TX lab mice and wildlings.** (a) The size of mLN of lab mice, TXlab mice and wildlings is shown. (b-d) They were subjected to RNA sequencing and PCA analysis was performed including the genes that were significantly different between lab mice and wildlings. (c) The distance between lab mice or TXwildlings to the centroid of the wildlings is shown (corresponding to Figure 4b) (d) The distance between wildlings and TXlab mice to the centroid of the lab mice is shown. (e-g) Livers of lab mice, TX lab mice and wildlings were subjected to RNA sequencing. (e) PCA analysis shows the genes significantly differently regulated between lab mice and wildlings. (f) The distance between lab mice or TXwildlings to the centroid of the wildlings is shown (corresponding to Figure 4c) (g) The distance between wildlings and TXlab mice to the centroid of the lab mice is shown. (h-j) The transcriptome of the lungs of lab mice, TXlab mice and wildlings was analyzed by RNA sequencing. (h) PCA using the genes significantly regulated between lab mice and wildlings compares the three groups. (i) The distance between lab mice or TXwildlings to the centroid of the wildlings is shown (corresponding to Figure 4g) (j) The distance between wildlings and TXlab mice to the centroid of the lab mice is shown. (k) The heatmap shows the significantly regulated genes ( $q < 0.05$ ) of the "adaptive immune response" gene sets. Color code depicts the row-wise scaled (z-score) RNA normalized expression. (l) Cytokines and chemokine concentration was analyzed in lung tissue by a multiplex MSD assay. Color code depicts the row-wise scaled (z-score) cytokine concentration. All cytokines, that were above the detection limit in  $>50\%$  of all samples are shown in the heatmap. Ellipses in (b), (e), and (h) represent the 95% confidence interval. Data are from two (b-l) or three (a) independent experiments with  $n=5$  per group. Median  $\pm$  IQR is shown. Statistical significances were tested by unpaired, two-tailed Mann-Whitney U tests. Source data are provided as a Source Data file.

## Supplementary Fig. 6

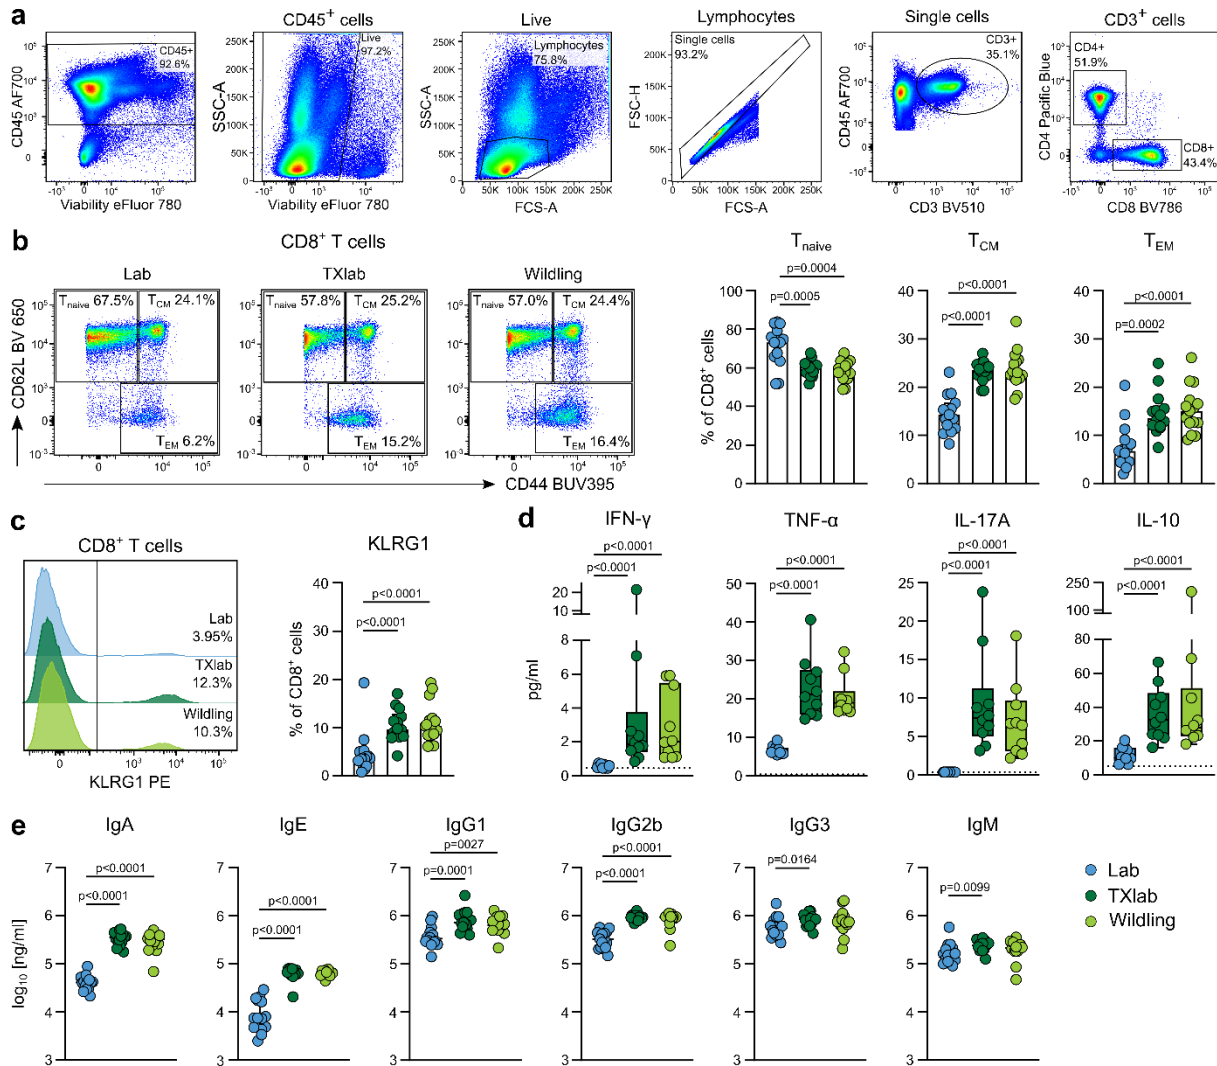

**Figure S6: Systemic immunity of TXlab mice is not altered.** (a-c) Blood cells were isolated, analyzed by flow cytometry, and gated for live CD45<sup>+</sup>CD3<sup>+</sup>CD8<sup>+</sup> cells as shown in the gating strategy in (a). (b) T<sub>naive</sub>, T<sub>CM</sub>, and T<sub>EM</sub> were identified by their expression of CD44 and CD62L as shown in the left panel and analyzed as the percentage of total CD8<sup>+</sup> cells. (c) KLRG1<sup>+</sup> cells were identified (left panel) and analyzed as percentage of total CD8<sup>+</sup> cells. (d) Serum cytokine concentrations were quantified using a multiplex MSD assay. (e) Antibody subclasses were measured in the serum of lab mice, TXlab mice, and wildlings. The shown data are from two (d) or three (b-c, e) independent experiments with n=5 mice per group. Dashed lines indicate the detection limit. Median  $\pm$  IQR is shown, box plots show the median, interquartile range, and full data spread via whiskers. Statistical significance was tested by unpaired, two-tailed Mann-Whitney U test,  $p < 0.05$  is shown. Source data are provided as a Source Data file.

**Supplementary Table 1**

| Group non-bacterial microorganisms | Taxonomic Classification form Contig Annotation Tool (CAT)                                                                                 |
|------------------------------------|--------------------------------------------------------------------------------------------------------------------------------------------|
| Fungi                              | Eukaryota;Ascomycota;Saccharomycetes;Saccharomycetales;Saccharomycetaceae;Arxiozyma;Arxiozyma heterogenica                                 |
| Fungi                              | Eukaryota;Chytridiomycota;Neocallimastigomycetes;Neocallimastigales;Neocallimastigaceae;Neocallimastix;no support                          |
| Fungi                              | Eukaryota;Ascomycota;Saccharomycetes;Saccharomycetales;Saccharomycetaceae;no support;no support                                            |
| Fungi                              | Eukaryota;Mucoromycota;Glomeromycetes;Glomerales;Glomeraceae;Rhizophagus;Rhizophagus irregularis                                           |
| Fungi                              | Eukaryota;Basidiomycota;Agaricomycetes;Boletales;Paxillaceae;Paxillus;no support                                                           |
| Fungi                              | Eukaryota;Chytridiomycota;Neocallimastigomycetes;Neocallimastigales;Neocallimastigaceae;Neocallimastix;Neocallimastix lanati (nom. inval.) |
| Fungi                              | Eukaryota;Ascomycota;Saccharomycetes;no support;no support;no support;no support                                                           |
| Fungi                              | Eukaryota;Mucoromycota;Glomeromycetes;no support;no support;no support;no support                                                          |
| Fungi                              | Eukaryota;Chytridiomycota;Neocallimastigomycetes;Neocallimastigales;Neocallimastigaceae;Piromyces;Piromyces finnis                         |
| Fungi                              | Eukaryota;Chytridiomycota;Neocallimastigomycetes;Neocallimastigales;Neocallimastigaceae;no support;no support                              |
| Fungi                              | Eukaryota;Microsporidia;NA;NA;Spragueidae;Spraguea*;Spraguea lophii*                                                                       |
| Fungi                              | Eukaryota;Chytridiomycota;Neocallimastigomycetes;Neocallimastigales;Neocallimastigaceae;Anaeromyces;Anaeromyces robustus                   |
| Fungi                              | Eukaryota;Chytridiomycota;Chytridiomycetes;NA;NA;Blyttomyces;Blyttomyces helicus                                                           |
| Fungi                              | Eukaryota;Zoopagomycota;Harpellomycetes;Harpellales;Legeriomycetaceae;Smittium;Smittium mucronatum                                         |
| Fungi                              | Eukaryota;Chytridiomycota;Neocallimastigomycetes;Neocallimastigales;Neocallimastigaceae;Piromyces;Piromyces sp. E2                         |
| Fungi                              | Eukaryota;Basidiomycota;Tremellomycetes;Filobasidiales;Filobasidiaceae;Naganishia;Naganishia vauhanmartinae                                |
| Fungi                              | Eukaryota;Ascomycota;no support;no support;no support;no support;no support                                                                |
| Fungi                              | Eukaryota;Microsporidia;NA;NA;Pleistophoridae;Vavraia;Vavraia culicis*                                                                     |
| Fungi                              | Eukaryota;Microsporidia;NA;NA;NA;Dictyocoela;Dictyocoela muelleri                                                                          |
| Fungi                              | Eukaryota;Chytridiomycota;Chytridiomycetes;Rhizophydiales;Terramycetaceae;Boothiomycetes;Boothiomycetes macroporus                         |
| Protozoa and similar eukaryotes    | Eukaryota;Parabasalia;NA;Tritrichomonadida;Tritrichomonadidae;Tritrichomonas;Tritrichomonas foetus                                         |
| Protozoa and similar eukaryotes    | Eukaryota;Apicomplexa;Aconoidasida;Haemosporida;Plasmodiidae;Plasmodium;Plasmodium yoelii                                                  |
| Protozoa and similar eukaryotes    | Eukaryota;Parabasalia;no support;no support;no support;no support;no support                                                               |
| Protozoa and similar eukaryotes    | Eukaryota;Parabasalia;NA;Tritrichomonadida;no support;no support;no support                                                                |
| Protozoa and similar eukaryotes    | Eukaryota;Parabasalia;NA;Trichomonadida;Trichomonadidae;Trichomonas;Trichomonas vaginalis                                                  |
| Protozoa and similar eukaryotes    | Eukaryota;Parabasalia;NA;Tritrichomonadida;Dientamoebidae;Histomonas;Histomonas meleagridis*                                               |
| Protozoa and similar eukaryotes    | Eukaryota;Evosea;NA;Mastigamoebida;Entamoebidae;Entamoeba;Entamoeba invadens                                                               |
| Protozoa and similar eukaryotes    | Eukaryota;Parabasalia;NA;Tritrichomonadida;Tritrichomonadidae;Tritrichomonas*;no support                                                   |
| Protozoa and similar eukaryotes    | Eukaryota;Fornicata;NA;Diplomonadida;Hexamitidae;Spirotrunculus;Spirotrunculus salmonicida                                                 |
| Protozoa and similar eukaryotes    | Eukaryota;Fornicata;NA;Diplomonadida;Hexamitidae;Giardia;Giardia intestinalis                                                              |
| Protozoa and similar eukaryotes    | Eukaryota;Fornicata;NA;Diplomonadida;Hexamitidae;Giardia*;no support                                                                       |
| Protozoa and similar eukaryotes    | Eukaryota;Preaxostyla;NA;Oxymonadida;Polymastigidae;Monocercomonoides;Monocercomonoides exilis                                             |
| Protozoa and similar eukaryotes    | Eukaryota;Preaxostyla;NA;Oxymonadida;Streblomastigidae;Streblomastix*;Streblomastix strux*                                                 |

|                                 |                                                                                                                             |
|---------------------------------|-----------------------------------------------------------------------------------------------------------------------------|
| Protozoa and similar eukaryotes | Eukaryota;Ciliophora;Oligohymenophorea;Hymenostomatida;Tetrahymenidae;Tetrahymena;Tetrahymena thermophila                   |
| Protozoa and similar eukaryotes | Eukaryota;Fornicata;NA;Diplomonadida;Hexamitidae*;no support;no support                                                     |
| Protozoa and similar eukaryotes | Eukaryota;Apicomplexa;Aconoidasida;Haemosporida;Plasmodiidae;Plasmodium;Plasmodium berghei                                  |
| Protozoa and similar eukaryotes | Eukaryota;Apicomplexa;Aconoidasida;Haemosporida;Plasmodiidae;Plasmodium;no support                                          |
| Protozoa and similar eukaryotes | Eukaryota;Ciliophora;Heterotrichea;Heterotrichida;Stentoridae;Stentor;Stentor coeruleus                                     |
| Protozoa and similar eukaryotes | Eukaryota;Fornicata;NA;Diplomonadida;Hexamitidae;Giardia;Giardia muris                                                      |
| Protozoa and similar eukaryotes | Eukaryota;Fornicata;NA;NA;NA;Kipferlia;Kipferlia bialata*                                                                   |
| Eukaryotic viruses              | Viruses;Cressdnaviricota;Arfiviricetes;Cirlivirales;Circoviridae;NA;Rodent circovirus                                       |
| Eukaryotic viruses              | Viruses;Cressdnaviricota;no support;no support;no support;no support;no support                                             |
| Eukaryotic viruses              | Viruses;Hofneiviricota;Faserviricetes;Tubulavirales;Inoviridae;NA;Inoviridae sp.                                            |
| Eukaryotic viruses              | Viruses;Artverviricota;Revtraviricetes;Ortervirales;Retroviridae;Intracisternal A-particles;Mouse Intracisternal A-particle |
| Fungus-like protists            | Eukaryota;Oomycota;NA;Saprolegniales;Saprolegniaceae;Aphanomyces;Aphanomyces euteiches                                      |

**Supplementary Table 1: Non-bacterial constituent of the microbiota.**

The table shows the taxonomic information of the top 20 non-bacterial microorganism per group that were found in wildlings and TXwildlings.



**Supplementary Table 2**

|                                                     | Lab mice (n=10-120)* | TXwildlings (n=20)** | Wildlings (n=20)** |
|-----------------------------------------------------|----------------------|----------------------|--------------------|
| <b>Bacteria</b>                                     |                      |                      |                    |
| <i>Bordetella bronchiseptica</i>                    | No                   | No                   | No                 |
| <i>Citrobacter rodentium</i>                        | No                   | No                   | No                 |
| <i>Clostridium piliforme</i>                        | No                   | No                   | No                 |
| <i>Corynebacterium kutscheri</i>                    | No                   | No                   | No                 |
| <i>Filobacterium rodentium</i> (CAR Bacillus)       | No                   | No                   | No                 |
| <i>Helicobacter</i> species                         | No                   | <b>Yes</b>           | <b>Yes</b>         |
| <i>Helicobacter bilis</i>                           | No                   | <b>Yes</b>           | <b>Yes</b>         |
| <i>Helicobacter ganmani</i>                         | No                   | <b>Yes</b>           | <b>Yes</b>         |
| <i>Helicobacter hepaticus</i>                       | No                   | No                   | No                 |
| <i>Helicobacter mastomyrinus</i>                    | No                   | <b>Yes</b>           | <b>Yes</b>         |
| <i>Helicobacter rodentium</i>                       | No                   | No                   | No                 |
| <i>Helicobacter typhlonius</i>                      | No                   | <b>Yes</b>           | <b>Yes</b>         |
| <i>Klebsiella oxytoca</i>                           | No                   | No                   | No                 |
| <i>Klebsiella pneumoniae</i>                        | No                   | No                   | No                 |
| <i>Mycoplasma pulmonis</i>                          | No                   | No                   | No                 |
| <i>Proteus mirabilis</i>                            | No                   | No                   | No                 |
| <i>Pseudomonas aeruginosa</i>                       | No                   | No                   | No                 |
| <i>Rodentibacter pneumotropicus</i>                 | No                   | No                   | No                 |
| <i>Rodentibacter heyltii</i>                        | No                   | No                   | No                 |
| <i>Salmonella</i> species                           | No                   | No                   | No                 |
| <i>Staphylococcus aureus</i>                        | No                   | No                   | No                 |
| <i>Streptobacillus moniliformis</i>                 | No                   | No                   | No                 |
| <i>Streptococcus pneumoniae</i>                     | No                   | No                   | No                 |
| <i>Streptococcus</i> sp. $\beta$ -hemolytic Group A | No                   | No                   | No                 |
| <i>Streptococcus</i> sp. $\beta$ -hemolytic Group B | No                   | No                   | No                 |
| <i>Streptococcus</i> sp. $\beta$ -hemolytic Group C | No                   | No                   | No                 |
| <i>Streptococcus</i> sp. $\beta$ -hemolytic Group G | No                   | No                   | No                 |
| <b>Viruses</b>                                      |                      |                      |                    |
| Ectromelia virus                                    | No                   | No                   | No                 |
| Mouse Rotavirus (EDIM)                              | No                   | No                   | No                 |
| Hantaan                                             | No                   | No                   | No                 |
| Lymphocytic Choriomeningitis Virus (LCMV)           | No                   | No                   | No                 |
| Mouse Adenovirus (MAdV-1)                           | No                   | No                   | No                 |
| Mouse Adenovirus (MAdV-2)                           | No                   | <b>Yes</b>           | <b>Yes</b>         |
| Murine Cytomegalovirus (MCMV)                       | No                   | No                   | No                 |
| Mouse Hepatitis Virus (MHV)                         | No                   | No                   | No                 |
| Murine Norovirus (MNV)                              | No                   | <b>Yes</b>           | <b>Yes</b>         |
| Mouse Parvoviruses (MPV)                            | No                   | No                   | No                 |
| Minute virus of mice (MVM)                          | No                   | No                   | No                 |
| Pneumonia Virus of Mice (PVM)                       | No                   | No                   | No                 |
| Reovirus (REO3)                                     | No                   | No                   | No                 |
| Sendai Virus                                        | No                   | No                   | No                 |

|                                                 |    |     |     |
|-------------------------------------------------|----|-----|-----|
| Theiler's murine encephalomyelitis virus (TMEV) | No | Yes | Yes |
| <b>Protozoa</b>                                 |    |     |     |
| <i>Chilomastix</i> species                      | No | Yes | Yes |
| <i>Cryptosporidium</i> species                  | No | No  | No  |
| <i>Eimeria</i> species                          | No | No  | No  |
| <i>Entamoeba muris</i>                          | No | Yes | Yes |
| <i>Giardia muris</i>                            | No | No  | No  |
| <i>Spironucleus muris</i>                       | No | Yes | Yes |
| <i>Tritrichomonas muris</i>                     | No | Yes | Yes |
| Pinworm species                                 |    |     |     |
| <i>Aspiculuris tetraptera</i>                   | No | Yes | Yes |
| <i>Syphacia muris</i>                           | No | No  | No  |
| <i>Syphacia obvelata</i>                        | No | No  | No  |

**Supplementary Table 2: Pathogen profile of lab mice, TXwildlings and wildlings.**

\* The hygiene standard of lab mice was assessed and reported by the mouse vendor (Taconic Biosciences).

\*\* The hygiene standard of TXwildlings and wildlings was determined by utilizing PCR (the Mouse 3R Quarantine Annual SOPF, MCMV, and Hantaan) on pooled samples and Global Serology on individual samples. A microorganism was considered present, if it was identified through at least one of the two independent methodologies.

**Supplementary Table 3**

| Fluorophor   | Antigen | Klon      | Dilution | Manufacturer | Catalogue number |
|--------------|---------|-----------|----------|--------------|------------------|
| BUV395       | CD44    | IM7       | 1:100    | BD           | 740215           |
| Pacific Blue | CD4     | GK1.5     | 1:1000   | BioLegend    | 100428           |
| BV510        | CD3     | 145-2C11  | 1:50     | BioLegend    | 100353           |
| BV650        | CD62L   | MEL-14    | 1:800    | BioLegend    | 104453           |
| BV786        | CD8     | 53-6.7    | 1:1500   | BD           | 563332           |
| PE           | KLRG1   | 2F1/KLRG1 | 1:800    | BioLegend    | 138407           |
| AF700        | CD45.2  | 104       | 1:400    | BioLegend    | 109822           |

**Table S3: Detailed antibody list.**
